# Supplementary material for: A novel FeMoOv nanozyme-based dual-mode sensing system for highly selective and sensitive glutathione monitoring
Source: Royal Society of Chemistry journal article supplement (doi:10.1039/d5nj03255e), 2025-12-04
Supplement: d5nj03255e1.pdf [file d5nj03255e1.pdf]

# Supplementary Information

## A Novel FeMoOv Nanozyme-Based Dual-Mode Sensing System for Highly Selective and Sensitive Glutathione Monitoring

Dapeng Zhou<sup>1,2,a</sup>, Xianfeng Wang<sup>3,a</sup>, Yuanhang Yu<sup>3,a</sup>, Chenkai Yangyang<sup>4,\*</sup>, Sen Yang<sup>5,\*</sup>, Jia Chen<sup>4,\*</sup>

<sup>1</sup> Department of Burn Plastic and Wound Repair Surgery, Affiliated Hospital of Youjiang Medical University for Nationalities, Baise, China

<sup>2</sup> Life Science and Clinical Medicine Research Center, Affiliated Hospital of Youjiang Medical University for Nationalities, Baise, China

<sup>3</sup> Wuxi School of Medicine, State Key Laboratory of Food Science and Technology, Jiangnan University, Wuxi, PR China

<sup>4</sup> Sichuan Provincial Center for Mental Health, Sichuan Provincial People's Hospital, School of Medicine, University of Electronic Science and Technology of China, Chengdu, China

<sup>5</sup> Daqiao Community Healthcare Center, Yangpu District, Shanghai, 200082, PR China

<sup>a</sup> Dapeng Zhou, Xianfeng Wang, and Yuanhang Yu contribute equally to this paper.

\* Corresponding authors

E-mail address:

[3550677322@qq.com](mailto:3550677322@qq.com) (Chenkai Yangyang)

[ysylq2020@126.com](mailto:ysylq2020@126.com) (Sen Yang)

[chenjia@med.uestc.edu.cn](mailto:chenjia@med.uestc.edu.cn) (Jia Chen)

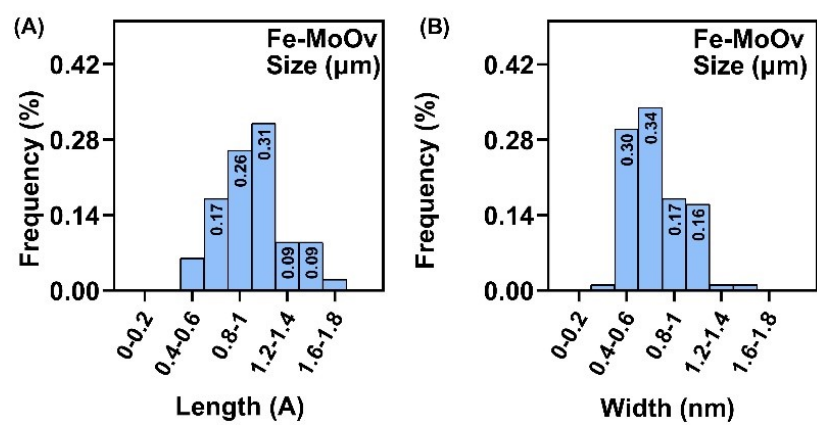

Fig. S1 The size distributions in length (A) and width (B) of Fe-MoOv

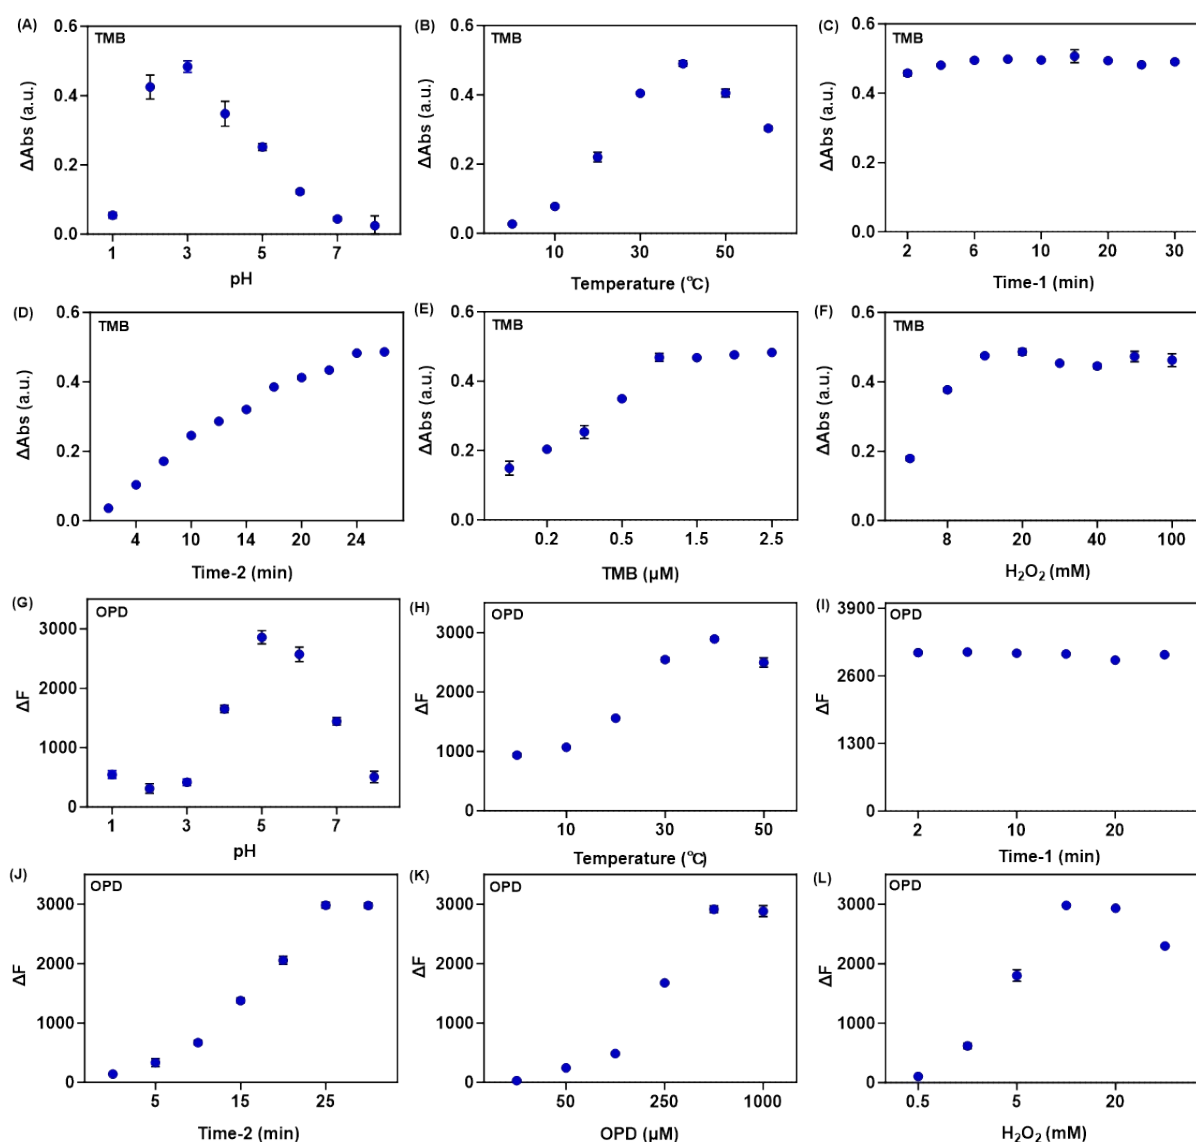

**Fig. S2.** Optimization of experimental conditions. Effects of pH (A), temperature (B), incubation time (C), chromogen development time (D), TMB concentration (E), and  $\text{H}_2\text{O}_2$  concentration (F) on absorbance change ( $\Delta A$ ) of TMB-mediated system. Effects of pH (G), temperature (H), incubation time (I), chromogen development time (J), TMB concentration (K), and  $\text{H}_2\text{O}_2$  concentration (L) on absorbance change ( $\Delta A$ ) of OPD-mediated system.

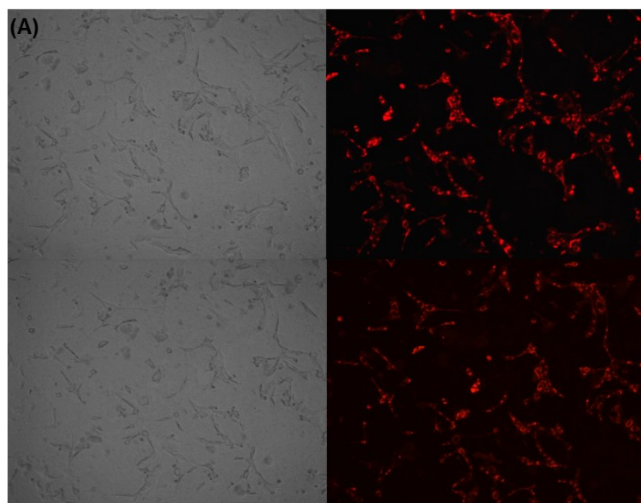

Fig. S3 Cell morphology of MDA-MB-231 cells labeled by DiL cell membrane probe

Table S1. Comparison of the analytical performance of recent Fe<sup>3+</sup>-mediated fluorescence sensors for GSH detection.

| Types           | Method       | Linear range (μM) | LOD (nM) | Reference |
|-----------------|--------------|-------------------|----------|-----------|
| HOF-PyTTA       | Fluorescence | 0-400             | 880      | [1]       |
| ThA@Ag/Au NCs   | Fluorescence | 0.03-95           | 9.0      | [2]       |
| FeMoOv nanozyme | Fluorescence | 0-100             | 76.5     | This work |

## Reference

1. Chen, X.; Li, N.; Lin, T.; Huang, J.; Hou, L.; Zhao, S. An off–on Fluorescence Sensor Based on Hydrogen-Bonded Organic Frameworks for the Detection of Glutathione. *Microchemical Journal* **2024**, *196*, 109555, doi:10.1016/j.microc.2023.109555.
2. Alqahtani, Y.S.; Mahmoud, A.M.; Medleri Khateeb, M.; Ali, R.; El-Wakil, M.M. Near-Infrared Fluorescent Probe for Selective and Sensitive Detection of Glutathione Based on Thioctic Acid-Functionalized Ag/Au NCs-Assisted by Ferric Ion. *Microchemical Journal* **2024**, *201*, 110752, doi:10.1016/j.microc.2024.110752.
